# Supplementary material
Source: publisher figshare collection journal article supplement (https://karger.figshare.com/ndownloader/files/14689724)

**Supplementary Fig. S1.** Representative agarose gel of PCR amplified products with INNO LiPA Mycobacteria v2 (LiPA) primers and genomic DNA from *M. tuberculosis*, (lane 1), *M. fortuitum* (lane 2), *M. avium* (lane 3), no DNA (Blank) (lane 4), *M. immunogenum* (lane 5), *M. gordonii* (lane 6), *M. kansasii* (lane 7), *M. abscessus* (lane 8) and *M. intracellulare* (lane 9). Lane M is 100 bp DNA ladder and DNA fragments of 100 bp, 300 bp and 600 bp are marked.


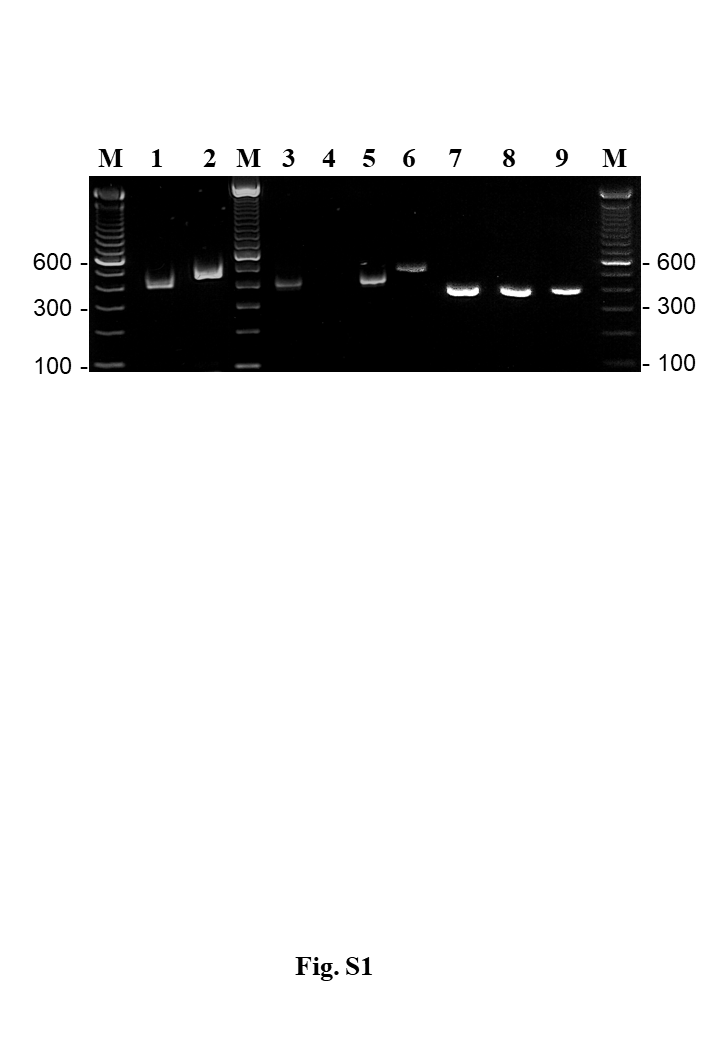

Supplement: Supplementary file 1 [file 14689724]
